# Supplementary material
Source: Springer Nature journal article supplement (https://www.springermedizin.de/resource/supplementary/13041_2014_291_MOESM14_ESM.pdf/25657922)

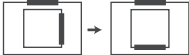

'ORIG' session (15 min)      'ROT' session (15 min)

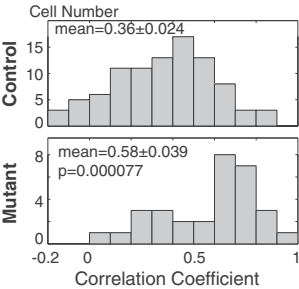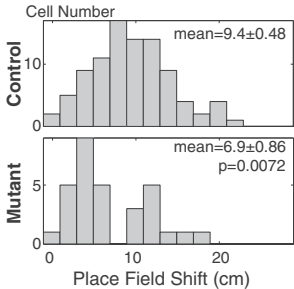

Supplement: MOESM14 [file 25657922]
